# Supplementary material for: Homozygosity for Mobile Element Insertions Associated with WBSCR17 Could Predict Success in Assistance Dog Training Programs
Source: MDPI journal article supplement (doi:10.3390/genes10060439), 2019-06-09
Supplement: s1 [file s1]

# Canine Behavioral Assessment & Research Questionnaire (short version)

## SECTION 1: Excitability

**INSTRUCTIONS:** Some dogs show little reaction to exciting events, while others become highly excited at the slightest novelty. By circling a number on the following 5-point scales (0=Calm, 4=Extremely excitable), please indicate your own dog's recent tendency to become excitable in the following circumstances (**please circle only one number**):

1. Just before being taken for a walk.

**Calm:** little or no special reaction 0.....1.....2.....3.....4 **Extremely excitable:** over-reacts, hard to calm down.

**Mild—Moderate excitability**

2. Just before being taken on a car trip.

**Calm:** little or no special reaction 0.....1.....2.....3.....4 **Extremely excitable:** over-reacts, hard to calm down.

**Mild—Moderate excitability**

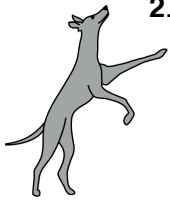

## SECTION 2: Aggression

**INSTRUCTIONS:** Most dogs display aggressive behavior from time to time—e.g. barking, growling, baring teeth, snapping, etc. By circling a number on the following 5-point scales (0= No aggression, 4= Serious aggression), please indicate your own dog's recent tendency to display aggressive behavior in each of the following circumstances (**please circle only one number**):

3. When approached directly by an unfamiliar **person** while being walked/exercised on a leash.

**No aggression:** No visible signs of aggression 0.....1.....2.....3.....4 **Serious aggression:** Snaps, bites or attempts to bite.

**Moderate aggression:** growling/barking—baring teeth

4. When toys, bones or other objects are taken away by a household member.

**No aggression:** No visible signs of aggression 0.....1.....2.....3.....4 **Serious aggression:** Snaps, bites or attempts to bite.

**Moderate aggression:** growling/barking—baring teeth

5. When approached directly by a household member while s/he (the dog) is eating.

**No aggression:** No visible signs of aggression 0.....1.....2.....3.....4 **Serious aggression:** Snaps, bites or attempts to bite.

**Moderate aggression:** growling/barking—baring teeth

6. When mailmen or other delivery workers approach your home.

|                                                            |                                                              |                                                                    |
|------------------------------------------------------------|--------------------------------------------------------------|--------------------------------------------------------------------|
| <b>No aggression:</b><br>No visible signs<br>of aggression | <b>Moderate aggression:</b><br>growling/barking—baring teeth | <b>Serious aggression:</b><br>Snaps, bites or<br>attempts to bite. |
| 0.....1.....2.....3.....4                                  |                                                              |                                                                    |

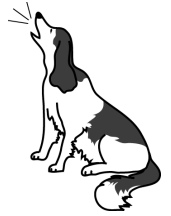

7. When his/her food is taken away by a household member.

|                                                            |                                                              |                                                                    |
|------------------------------------------------------------|--------------------------------------------------------------|--------------------------------------------------------------------|
| <b>No aggression:</b><br>No visible signs<br>of aggression | <b>Moderate aggression:</b><br>growling/barking—baring teeth | <b>Serious aggression:</b><br>Snaps, bites or<br>attempts to bite. |
| 0.....1.....2.....3.....4                                  |                                                              |                                                                    |

8. When approached directly by an unfamiliar **dog** while being walked/exercised on a leash.

|                                                            |                                                              |                                                                    |
|------------------------------------------------------------|--------------------------------------------------------------|--------------------------------------------------------------------|
| <b>No aggression:</b><br>No visible signs<br>of aggression | <b>Moderate aggression:</b><br>growling/barking—baring teeth | <b>Serious aggression:</b><br>Snaps, bites or<br>attempts to bite. |
| 0.....1.....2.....3.....4                                  |                                                              |                                                                    |

9. When strangers walk past your home when your dog is outside or in the yard.

|                                                            |                                                              |                                                                    |
|------------------------------------------------------------|--------------------------------------------------------------|--------------------------------------------------------------------|
| <b>No aggression:</b><br>No visible signs<br>of aggression | <b>Moderate aggression:</b><br>growling/barking—baring teeth | <b>Serious aggression:</b><br>Snaps, bites or<br>attempts to bite. |
| 0.....1.....2.....3.....4                                  |                                                              |                                                                    |

10. When barked, growled, or lunged at by another (unfamiliar) dog.

|                                                            |                                                              |                                                                    |
|------------------------------------------------------------|--------------------------------------------------------------|--------------------------------------------------------------------|
| <b>No aggression:</b><br>No visible signs<br>of aggression | <b>Moderate aggression:</b><br>growling/barking—baring teeth | <b>Serious aggression:</b><br>Snaps, bites or<br>attempts to bite. |
| 0.....1.....2.....3.....4                                  |                                                              |                                                                    |

11. When approached while eating by another (familiar) household **dog** (leave blank if no other dogs).

|                                                            |                                                              |                                                                    |
|------------------------------------------------------------|--------------------------------------------------------------|--------------------------------------------------------------------|
| <b>No aggression:</b><br>No visible signs<br>of aggression | <b>Moderate aggression:</b><br>growling/barking—baring teeth | <b>Serious aggression:</b><br>Snaps, bites or<br>attempts to bite. |
| 0.....1.....2.....3.....4                                  |                                                              |                                                                    |

12. When approached while playing with/chewing a favorite toy, bone, object, etc., by another (familiar) household **dog** (leave blank if no other dogs).

|                                                            |                                                              |                                                                    |
|------------------------------------------------------------|--------------------------------------------------------------|--------------------------------------------------------------------|
| <b>No aggression:</b><br>No visible signs<br>of aggression | <b>Moderate aggression:</b><br>growling/barking—baring teeth | <b>Serious aggression:</b><br>Snaps, bites or<br>attempts to bite. |
| 0.....1.....2.....3.....4                                  |                                                              |                                                                    |

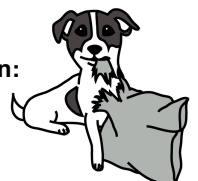

### SECTION 3: Fear and Anxiety

**INSTRUCTIONS:** Dogs often show signs of anxiety or fear when exposed to particular sounds, objects, persons or situations—e.g. crouching or cringing with tail tucked between the legs; whimpering or whining, freezing, trembling, or attempting to escape or hide. Using the following 5-point scales (0=No fear, 4=Extreme fear), please indicate your own dog's recent tendency to display fearful behavior in the following circumstances (**please circle only one number**):

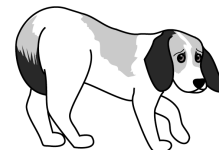

13. When approached directly by an unfamiliar person while away from your home.

**No fear/anxiety:**

No visible signs  
of fear

0.....1.....2.....3.....4

**Mild—Moderate fear/anxiety**

**Extreme fear:**

cowers; retreats or  
hides, etc.

14. In response to sudden or loud noises (e.g. thunder, vacuum cleaner, car backfire, road drills, objects being dropped, etc.).

**No fear/anxiety:**

No visible signs  
of fear

0.....1.....2.....3.....4

**Mild—Moderate fear/anxiety**

**Extreme fear:**

cowers; retreats or  
hides, etc.

15. When an unfamiliar person tries to touch or pet the dog.

**No fear/anxiety:**

No visible signs  
of fear

0.....1.....2.....3.....4

**Mild—Moderate fear/anxiety**

**Extreme fear:**

cowers; retreats or  
hides, etc.

16. In response to strange or unfamiliar objects on or near the sidewalk (e.g. plastic trash bags, leaves, litter, flags flapping, etc.).

**No fear/anxiety:**

No visible signs  
of fear

0.....1.....2.....3.....4

**Mild—Moderate fear/anxiety**

**Extreme fear:**

cowers; retreats or  
hides, etc.

17. When approached directly by an unfamiliar dog.

**No fear/anxiety:**

No visible signs  
of fear

0.....1.....2.....3.....4

**Mild—Moderate fear/anxiety**

**Extreme fear:**

cowers; retreats or  
hides, etc.

18. When first exposed to unfamiliar situations (e.g. first car trip, first time in elevator, first visit to veterinarian, etc.).

**No fear/anxiety:**

No visible signs  
of fear

0.....1.....2.....3.....4

**Mild—Moderate fear/anxiety**

**Extreme fear:**

cowers; retreats or  
hides, etc.

19. When barked, growled, or lunged at by an unfamiliar dog.

**No fear/anxiety:**

No visible signs  
of fear

0.....1.....2.....3.....4

**Mild—Moderate fear/anxiety**

**Extreme fear:**

cowers; retreats or  
hides, etc.

20. When having nails clipped by a household member.

**No fear/anxiety:**

No visible signs  
of fear

**Mild—Moderate fear/anxiety**

0.....1.....2.....3.....4

**Extreme fear:**

cowers; retreats or  
hides, etc.

21. When groomed or bathed by a household member.

**No fear/anxiety:**

No visible signs  
of fear

**Mild—Moderate fear/anxiety**

0.....1.....2.....3.....4

**Extreme fear:**

cowers; retreats or  
hides, etc.

#### SECTION 4: Separation-related behavior.

**INSTRUCTIONS:** Some dogs show signs of anxiety when left alone, even for short periods of time. Thinking back over the recent past, how often has your dog shown each of the following signs of anxiety when left, or about to be left, on its own (**please check only one box per question**):

|                                                                 | Never                    | Seldom                   | Sometimes                | Usually                  | Always                   |
|-----------------------------------------------------------------|--------------------------|--------------------------|--------------------------|--------------------------|--------------------------|
| 22. Restlessness/agitation/pacing.                              | <input type="checkbox"/> |
| 23. Barking or whining.                                         | <input type="checkbox"/> |
| 24. Chewing/scratching at doors, floor, windows, curtains, etc. | <input type="checkbox"/> |

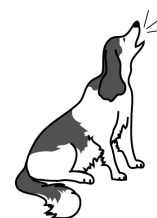

#### SECTION 5: Attachment and Attention-seeking.

**INSTRUCTIONS:** Most dogs are strongly attached to their people, and some demand a great deal of attention and affection from them. Thinking back over the recent past, how often has your dog shown each of the following signs of attachment or attention-seeking (**please check only one box per question**):

|                                                                                                 | Never                    | Seldom                   | Sometimes                | Usually                  | Always                   |
|-------------------------------------------------------------------------------------------------|--------------------------|--------------------------|--------------------------|--------------------------|--------------------------|
| 25. Tends to follow you (or other members of the household) about the house, from room to room. | <input type="checkbox"/> |
| 26. Tends to sit close to, or in contact with, you (or others) when you are sitting down        | <input type="checkbox"/> |

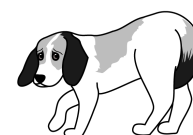

## SECTION 6: Training and obedience

**INSTRUCTIONS:** Some dogs are more obedient and trainable than others. By checking the appropriate boxes, please indicate how trainable or obedient your dog has been in each of the following situations in the recent past (**please check only one box per question**):

|                                                                | Never                    | Seldom                   | Sometimes                | Usually                  | Always                   |
|----------------------------------------------------------------|--------------------------|--------------------------|--------------------------|--------------------------|--------------------------|
| 27. Obeys a "sit" command immediately.                         | <input type="checkbox"/> |
| 28. Obeys a "stay" command immediately.                        | <input type="checkbox"/> |
| 29. Easily distracted by interesting sights, sounds or smells. | <input type="checkbox"/> |



## SECTION 7: Miscellaneous problems

**INSTRUCTIONS:** Dogs display a wide range of miscellaneous behavior problems in addition to those already covered by this questionnaire. Thinking back over the recent past, please indicate how often your dog has shown any of the following behaviors (**please check only one box per question**):

|                                                                       | Never                    | Seldom                   | Sometimes                | Usually                  | Always                   |
|-----------------------------------------------------------------------|--------------------------|--------------------------|--------------------------|--------------------------|--------------------------|
| 30. Chases or would chase birds, given the chance.                    | <input type="checkbox"/> |
| 31. Chases or would chase squirrels, rabbits, etc., given the chance. | <input type="checkbox"/> |
| 32. Escapes or would escape from home or yard, given the chance.      | <input type="checkbox"/> |
| 33. Chews inappropriate objects.                                      | <input type="checkbox"/> |
| 34. Pulls excessively hard when on the leash.                         | <input type="checkbox"/> |
| 35. Urinates against objects/ furnishings in your home.               | <input type="checkbox"/> |
| 36. Urinates when left alone at night, or during the daytime.         | <input type="checkbox"/> |
| 37. Defecates when left alone at night, or during the daytime.        | <input type="checkbox"/> |

|                                                       |                          |                          |                          |                          |                          |
|-------------------------------------------------------|--------------------------|--------------------------|--------------------------|--------------------------|--------------------------|
| 38. Hyperactive, restless, has trouble settling down. | <input type="checkbox"/> |
| 39. Playful, puppyish, boisterous.                    | <input type="checkbox"/> |
| 40. Active, energetic, always on the go.              | <input type="checkbox"/> |
| 41. Chases own tail/hind end.                         | <input type="checkbox"/> |
| 42. Barks persistently when alarmed or excited.       | <input type="checkbox"/> |

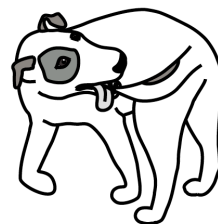

**Thank you for providing this helpful information!**
